# Supplementary material for: Length-independent charge transport of well-separated single-crystal TiO2 long nanowire arrays
Source: Royal Society of Chemistry journal article supplement (doi:10.1039/c8sc02335b), 2018-01-01
Supplement: c8sc02335b1.pdf [file c8sc02335b1.pdf]

## Supporting Information

### Length-Independent Charge Transport of Well-Separated Single-Crystal TiO<sub>2</sub> Nanowire Arrays

Jie Liu, Xia Sheng, Fengying Guan, Ke Li, Dandan Wang, Liping Chen, Xinjian Feng\*

College of Chemistry, Soochow University, Suzhou 215123, P. R. China

#### Materials and methods

**Synthesis of rutile TiO<sub>2</sub> nanoparticle (NP) films.** In a typical synthesis, titanium tetrachloride (TiCl<sub>4</sub>) was used as starting material. It was added slowly into ice water under stirring to prepare a TiCl<sub>4</sub> (4.5 M) aqueous solution. The pH (pH=1) of the medium was adjusted using KOH. Then 13 mL of the TiCl<sub>4</sub> (1.0 M) solution was placed to a 23 mL Teflon-lined stainless-steel autoclave apparatus and kept at 493 K for 2 h. After the autoclave was cooled to room temperature, the suspension was centrifuged, washed with ethanol and dried at 353 K. The resulting NPs were then coated onto TiO<sub>2</sub>-seeded FTO substrates followed by a 30 min heat treatment at 723 K.<sup>1</sup>

**Assembly of dye sensitized solar cells (DSSCs).** As-prepared samples were coated with dye by immersion for 24 h at ambient temperature in a 0.5 mM ethanolic solution of commercial N719 dye. The electrolyte is composed of 1,2-dimethyl-3-propylimidazolium iodide, lithium iodide, iodine, tributyl phosphate, guanidinium isothiocyanate. The counter electrode was fabricated by deposition of a thin layer of platinum. The thickness of the electrolyte layer between the rutile TiO<sub>2</sub> NWs and counter electrode was fixed by the use of a 25 μm thick Surlyn 1702 film spacer.

**Characterization:** The morphology of the TiO<sub>2</sub> NWs and assembled DSSCs were examined by SEM (S4700, Hitachi, Tokyo, Japan) and TEM (Tecnai G2 F20 S-Twin, FEI, USA, 200 kV). X-ray diffraction (XRD) analysis was performed using an X-ray powder diffractometer (X'Pert Pro MPD, Holland Panalytical). The photocurrent density and photovoltage of the DSSCs were measured with active sample areas of about 0.36 cm<sup>2</sup> using a Xe lamp with AM-1.5 simulated sunlight filter. Electron transport and recombination properties were measured by intensity-modulated photocurrent spectroscopy (IMPS) and photovoltage spectroscopies (IMVS) on a photoelectrochemical measurement system (Modulab XM photoEchem, Solartron, UK).

#### References

- 1 H. Cheng, J. Ma, Z. Zhao and L. Qi, *Chem. Mater.*, 1995, **7**, 663-671.

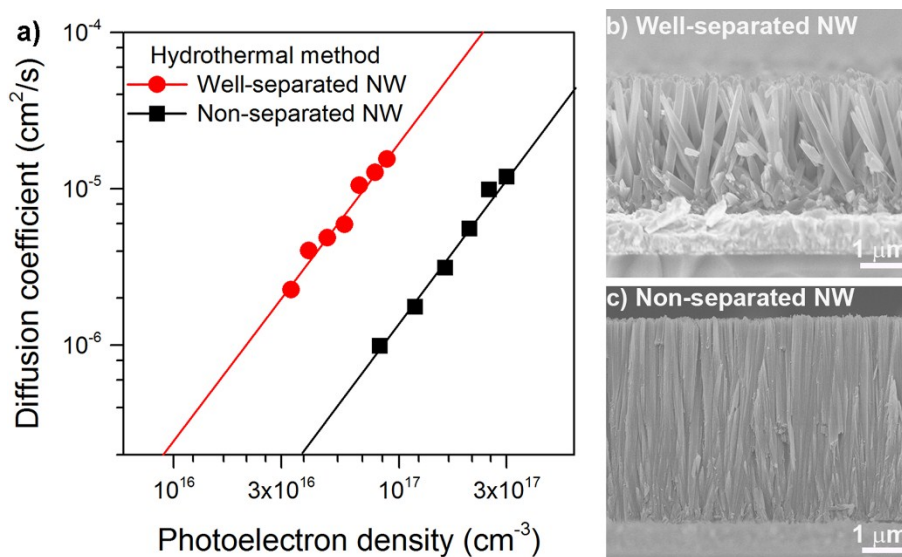

**Figure S1.** (a) Comparison of electron diffusion coefficients as a function of the photoelectron density for well-separated and non-separated  $\text{TiO}_2$  NWs based cells. (b) and (c) are, respectively, SEM images of the well-separated and non-separated  $\text{TiO}_2$  NWs. The well-separated NWs were prepared by using mixed reaction solutions of 6 mL HCl, 6 mL DI water and 0.2 mL TBOT at 453 K for 3h. The non-separated NWs were prepared by using mixed solutions of 6 mL HCl, 6 mL DI water and 0.4 mL TBOT at 453 K for 3h.

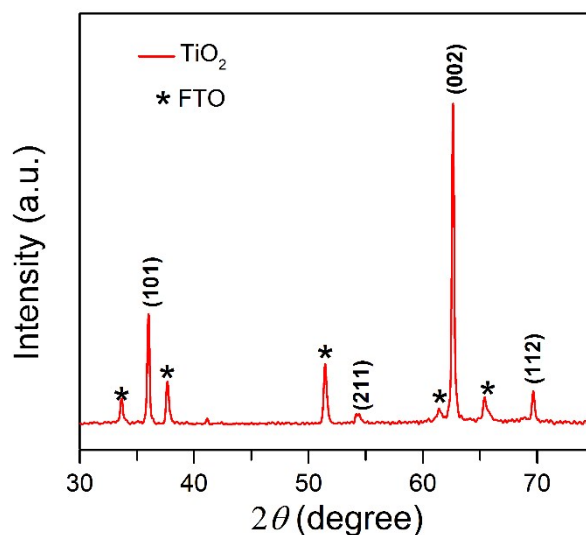

**Figure S2.** XRD pattern of the as-prepared NWs with a preferred [001] orientation.

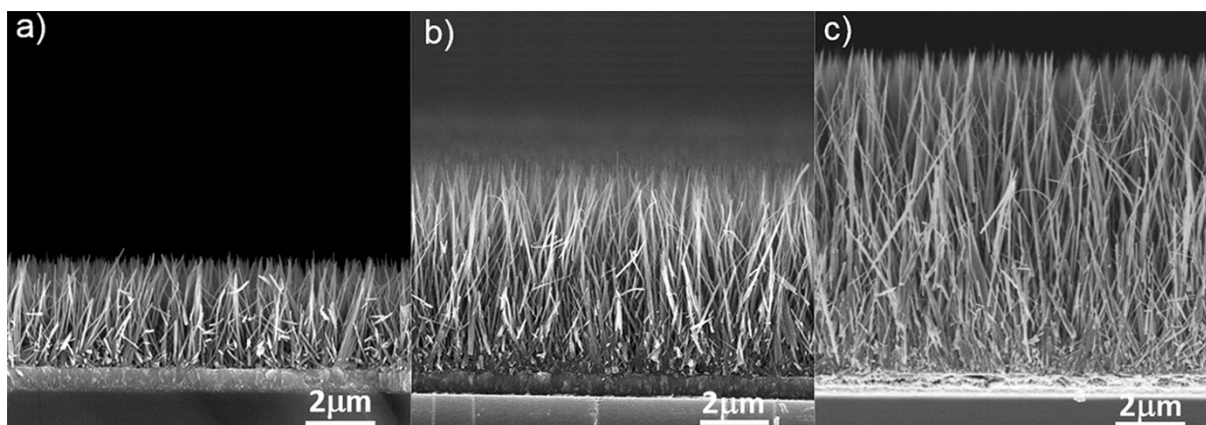

**Figure S3.** (a-c) SEM images of the TiO<sub>2</sub> NWs obtained after reaction times of 2.5 h, 3.5 h and 4.5 h.

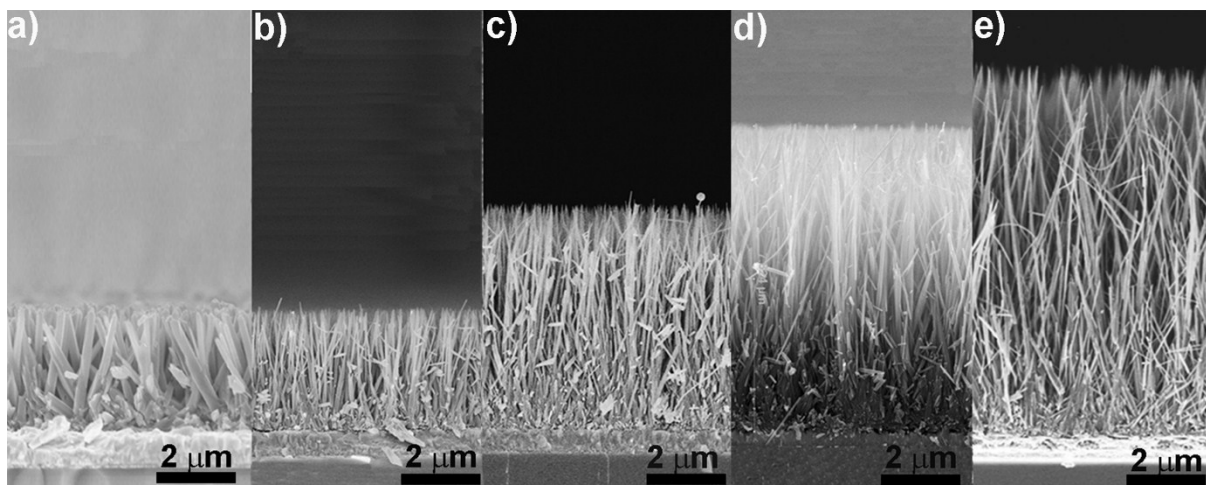

**Figure S4.** SEM images of TiO<sub>2</sub> NWs obtained under different growth conditions: (a) Synthesized by using a mixed solution of 6 mL HCl, 6 mL DI water and 0.2 mL TBOT at 453 K for a reaction time of 3 h. (b) Synthesized by using a mixed solution of 10 mL HCl, 2 mL DI water and 1.3 mL TBOT at 443 K for a reaction time of 2 h. (c) Synthesized by using a mixed solution of 10 mL HCl, 1 mL butanone, 1 mL DI water and 1.3 mL TBOT at 443 K for a reaction time of 3.5 h. (d) Synthesized by using a mixed solution of 10 mL HCl, 2 mL butanone, and 1.3 mL TBOT at 443 K for a reaction time of 4 h and 15 min. (e) Synthesized by using a mixed solution of 10 mL HCl, 1.9 mL 2-butanone, 0.1 mL ethanol, and 1.3 mL TBOT at 443 K for a reaction time of 4.5 h.

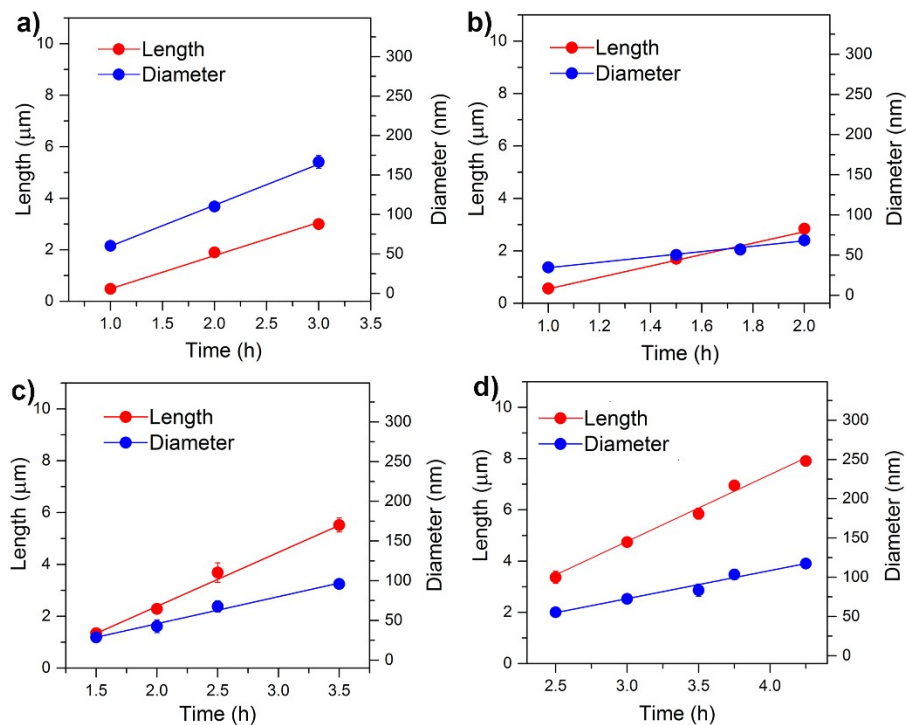

**Figure S5.** (a-d) Length and diameter of the  $\text{TiO}_2$  NWs versus growth time under different growth conditions as shown in Table 1. Lines are fits to the data, and error bars represent one standard deviation.

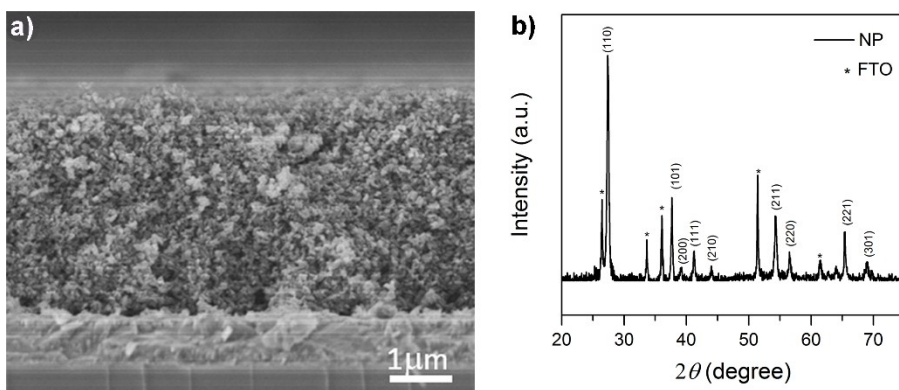

**Figure S6.** SEM image and XRD pattern of the  $\text{TiO}_2$  NP film.

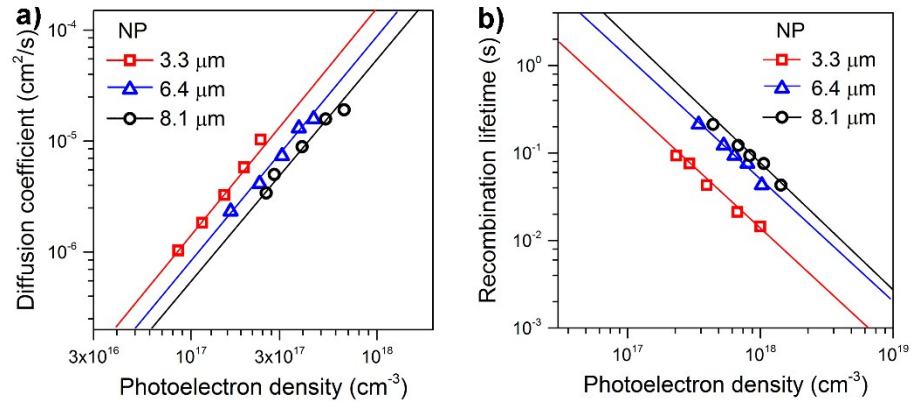

**Figure S7.** Comparison of electron diffusion coefficients and recombination lifetimes as a function of the photoelectron density for 3.3  $\mu\text{m}$ , 6.4  $\mu\text{m}$  and 8.1  $\mu\text{m}$  thick  $\text{TiO}_2$  NP film-based cells.

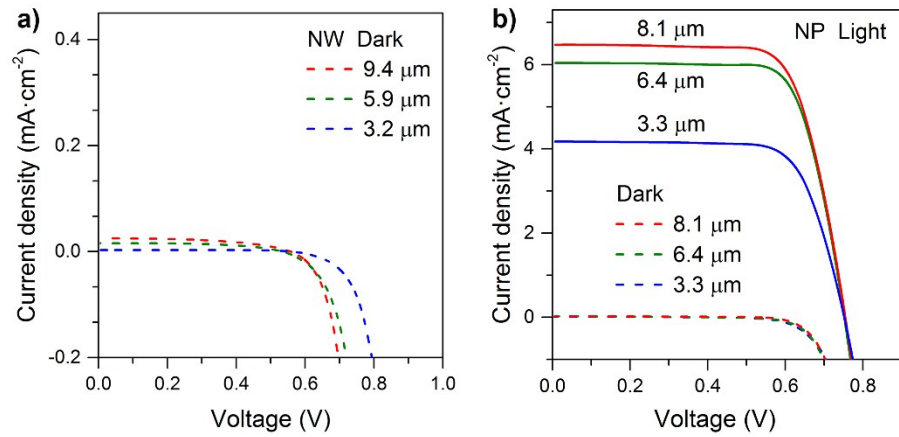

**Figure S8.** Performance of the  $\text{TiO}_2$  NW and NP-based cells. (a) Comparison of the current density–voltage characteristics of the NW-based cells in the dark. (b) Comparison of the current density–voltage characteristics of the  $\text{TiO}_2$  NP-based cells under AM 1.5 illumination and in the dark.

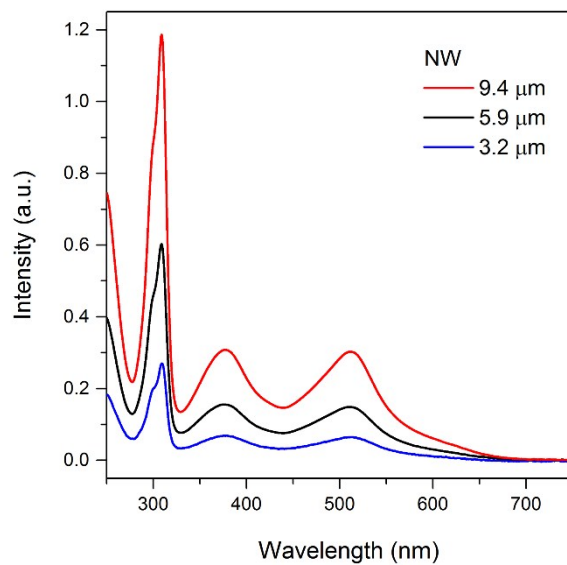

**Figure S9.** UV-Vis spectra of dye solutions desorbed from the as-prepared  $\text{TiO}_2$  NWs for different synthesis times, ranging from 2.5 h to 4.5 h, indicating that the NWs of 4.5 h growth have the highest surface area.

**Table S1.** Roughness factor of the NWs calculated from UV-Vis spectra of Figure S9; the adsorbed area per dye molecule is assumed to be  $1.6 \text{ nm}^2$ .

| Thickness of film<br>( $\mu\text{m}$ ) | Dye adsorption<br>( $\text{nmol}/\text{cm}^2$ ) | Roughness factor |
|----------------------------------------|-------------------------------------------------|------------------|
| 3.2                                    | 6.46                                            | 62               |
| 5.9                                    | 16.76                                           | 161              |
| 9.4                                    | 23.18                                           | 223              |

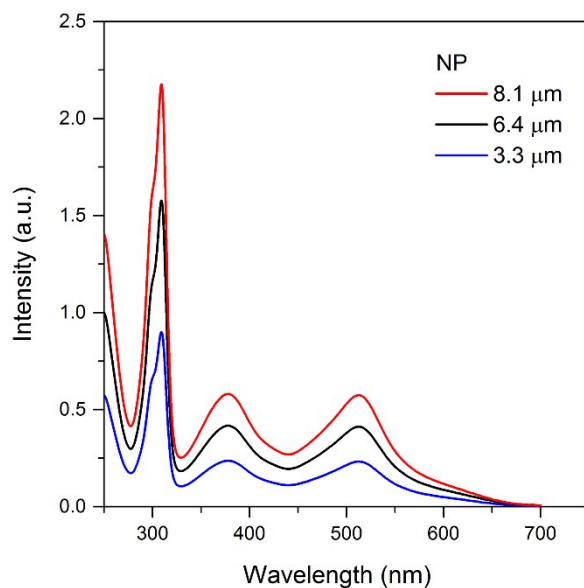

**Figure S10.** UV-Vis spectra of dye solutions desorbed from the as-prepared TiO<sub>2</sub> NP films of different thicknesses, ranging from 3.3  $\mu\text{m}$  to 8.1  $\mu\text{m}$ .

**Table S2.** Roughness factor of the NP films calculated from UV-Vis spectra of Figure S10; adsorbed area per dye molecule is assumed to be 1.6 nm<sup>2</sup>.

| Thickness of film<br>( $\mu\text{m}$ ) | Dye adsorption<br>(nmol/cm <sup>2</sup> ) | Roughness factor |
|----------------------------------------|-------------------------------------------|------------------|
| 3.3                                    | 36.00                                     | 347              |
| 6.4                                    | 62.79                                     | 605              |
| 8.1                                    | 87.99                                     | 848              |

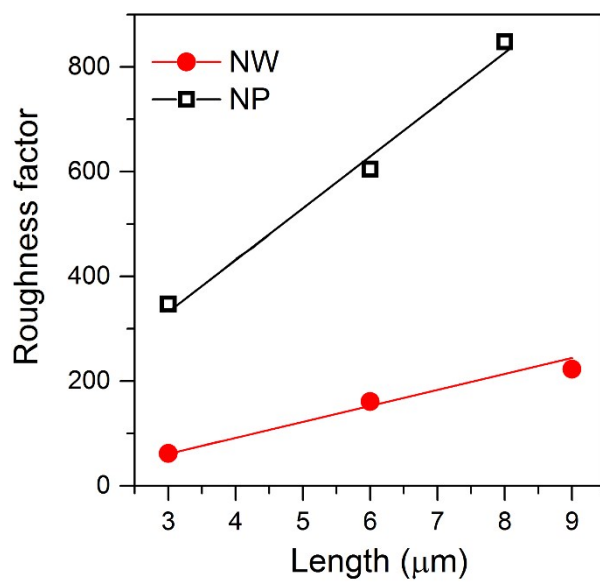

**Figure S11.** Dependence of the roughness factor on film thickness of  $\text{TiO}_2$  NWs and  $\text{TiO}_2$  NP films.
